# Supplementary material for: Evaluation and Hydrological Application of Four Gridded Precipitation Datasets over a Large Southeastern Tibetan Plateau Basin
Source: MDPI journal article supplement (doi:10.3390/rs14122936), 2022-06-19
Supplement: s1 [file s1]

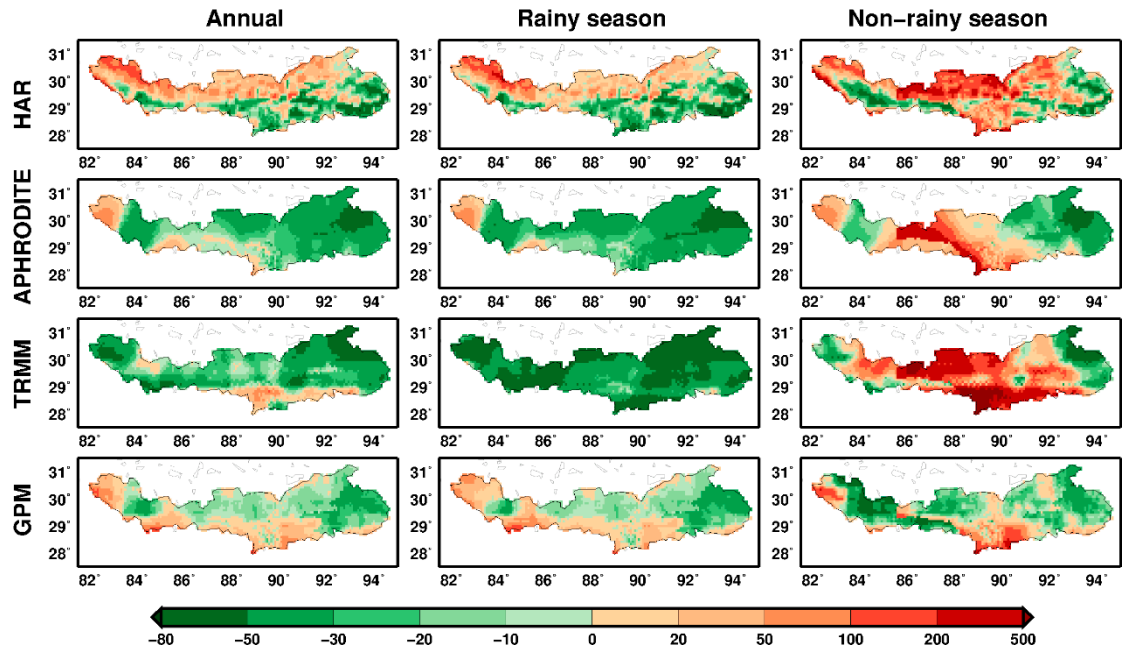

**Figure S1.** Spatial distributions of relative bias (%) of four precipitation datasets to the PCP\_Sun at annual period, rainy season, and non-rainy season.

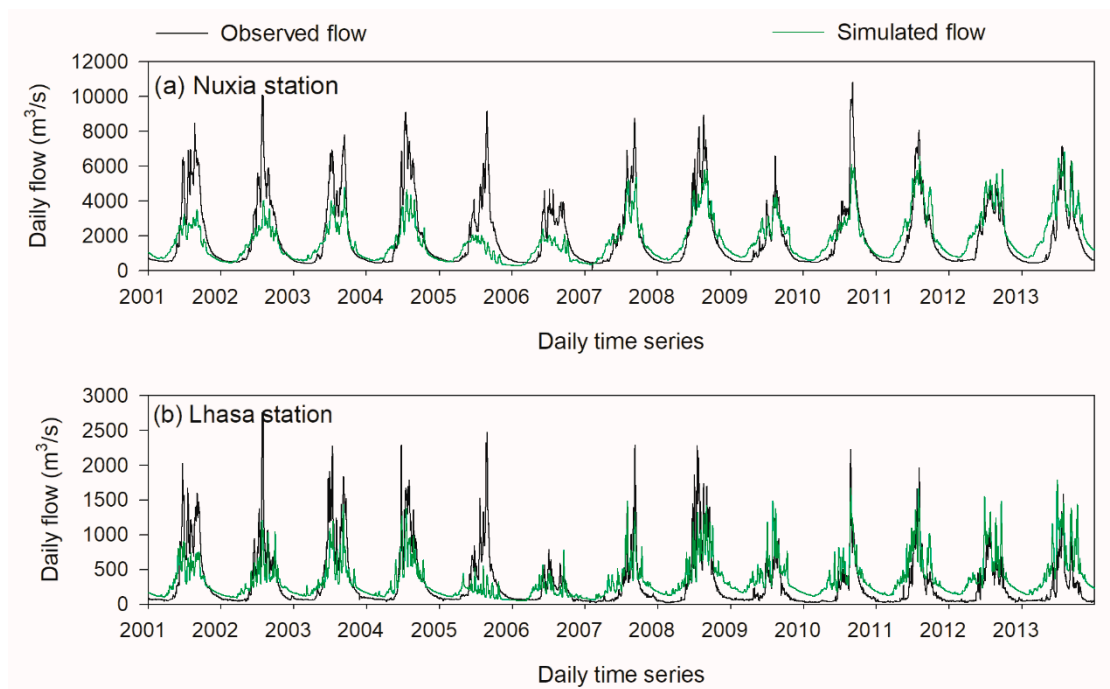

**Figure S2.** Daily flow simulation at Nuxia (a) and Lhasa hydrological stations (b), with recalibrated parameters using HAR-specific input.

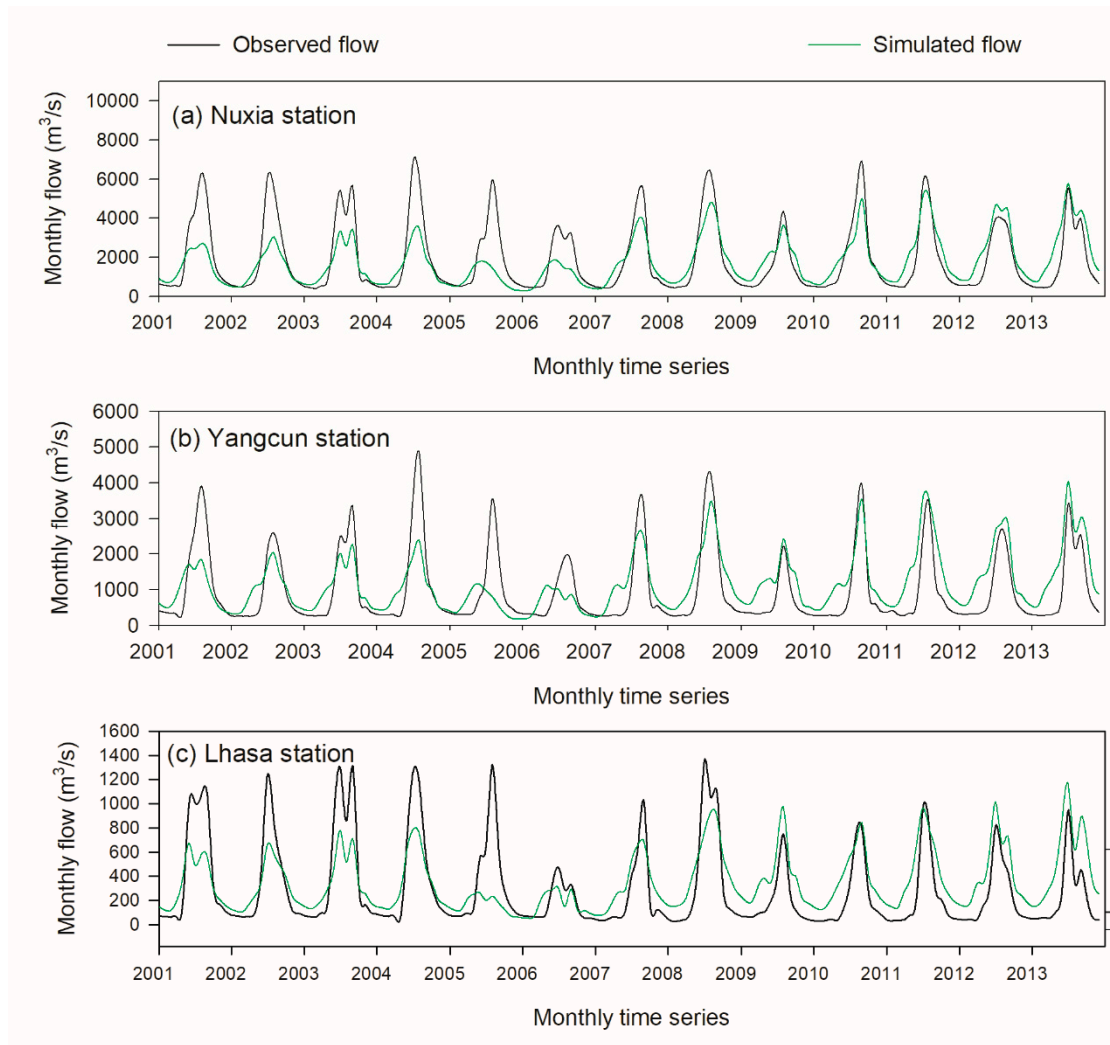

**Figure S3.** Monthly flow simulation at Nuxia (a), Yangcun (b), and Lhasa hydrological stations (c), with recalibrated parameters using HAR-specific input.

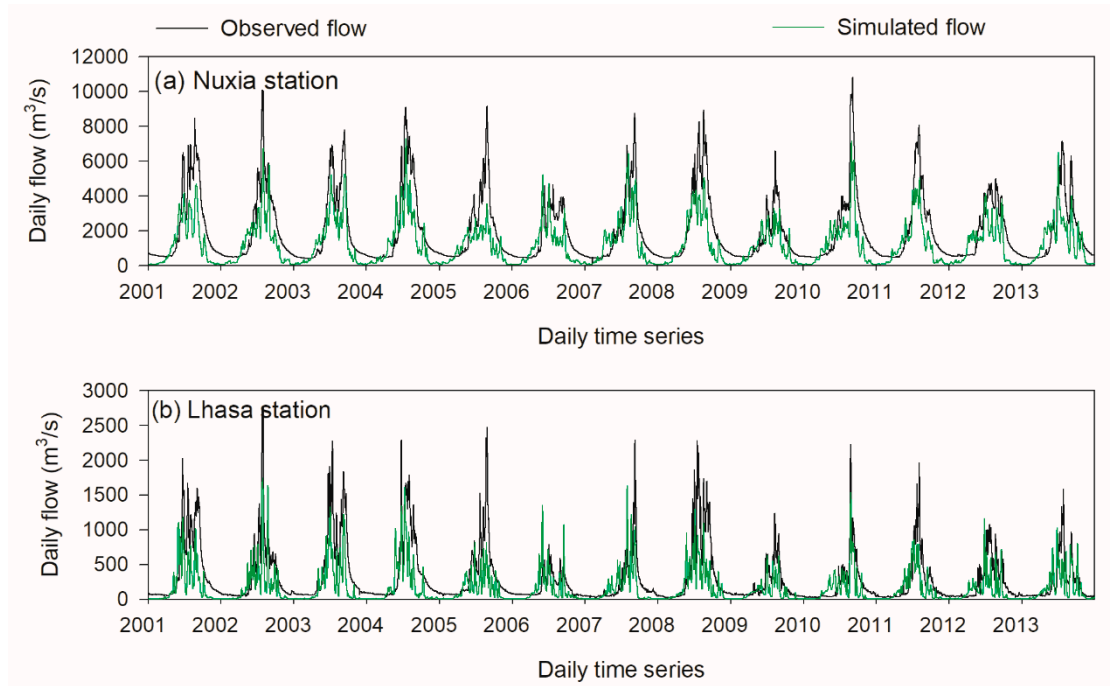

**Figure S4.** Daily flow simulation at Nuxia (a) and Lhasa hydrological stations (b), with recalibrated parameters using APHRODITE-specific input.

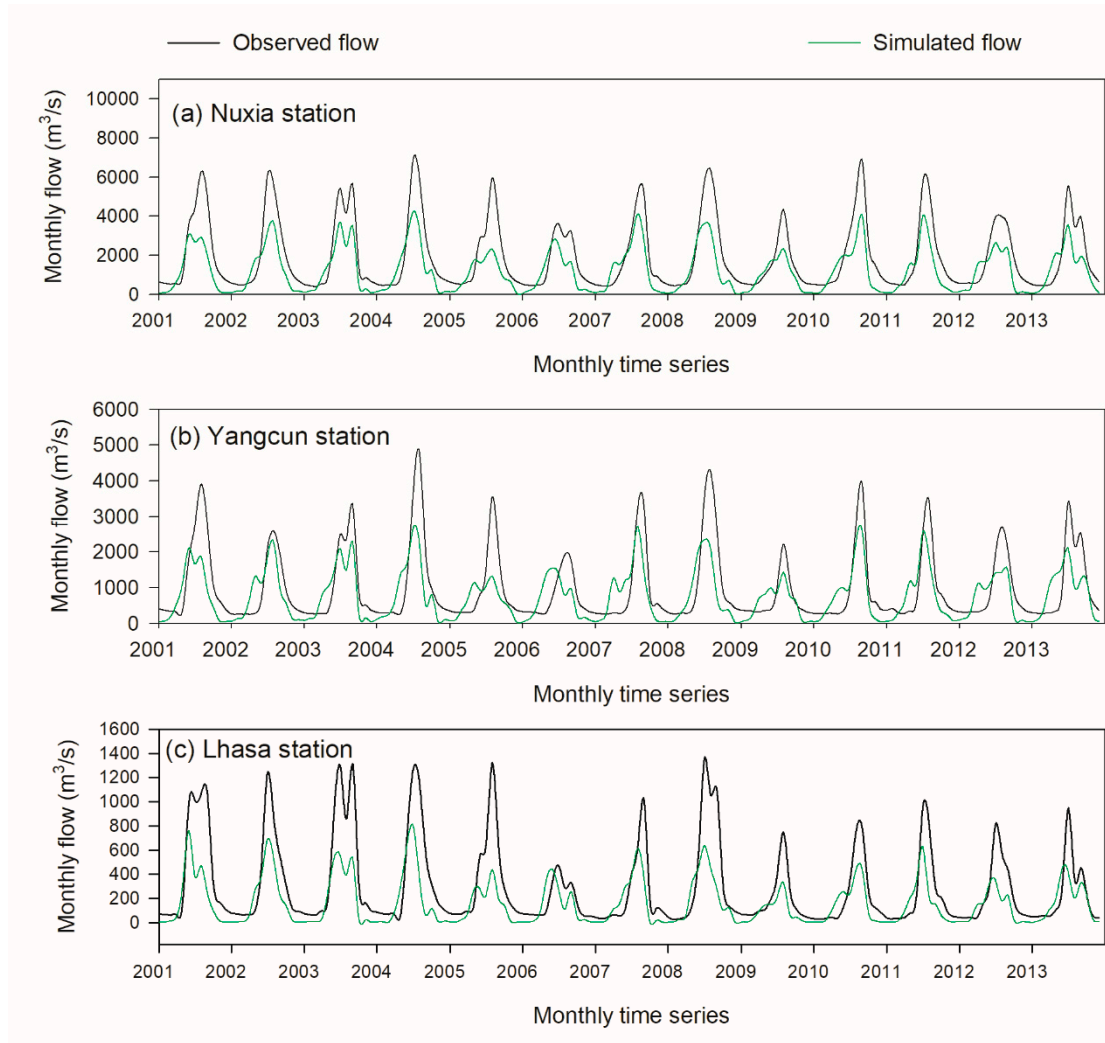

**Figure S5.** Monthly flow simulation at Nuxia (a), Yangcun (b), and Lhasa hydrological stations (c), with recalibrated parameters using APHRODITE-specific input.

**Table S1.** List of VIC-glacier model parameters, ranges, and recalibrated values of HAR and APHRODITE.

| Model Parameter                                         | Unit                       | Range    | PCP_Sun<br>* | HAR | APHRODIT<br>E |
|---------------------------------------------------------|----------------------------|----------|--------------|-----|---------------|
| Degree-day factor for ice-melt ( $DDF_{ice}$ )          | $mm^{\circ}C^{-1}day^{-1}$ | 3.4–11.8 | 9            | 9   | 9             |
| Degree-day factor for snowmelt ( $DDF_{snow}$ )         | $mm^{\circ}C^{-1}day^{-1}$ | 3.0–7.9  | 4.1          | 4.1 | 4.1           |
| Fraction of Dsmax where non-linear baseflow begins (Ds) | None                       | 0–1      | 0.3          | 0.3 | 0.3           |

|                                                                              |      |       |     |     |     |
|------------------------------------------------------------------------------|------|-------|-----|-----|-----|
| Maximum velocity of baseflow ( $D_{\text{smax}}$ )                           | mm/d | 0–50  | 10  | 10  | 10  |
| Fraction of maximum soil moisture where non-linear baseflow occurs ( $W_s$ ) | None | 0–1   | 0.9 | 0.9 | 0.9 |
| Variable infiltration curve parameter ( $b_{\text{infiltr}}$ )               | None | 0–0.4 | 0.2 | 0.1 | 0.3 |
| Thickness of the second soil moisture layer ( $d_2$ )                        | m    | 0–3   | 1.1 | 2.9 | 0.1 |

\* The parameters calibrated by the PCP\_Sun were placed here for comparison to those of HAR and APHRODITE by using input-specific calibration method.

**Table S2.** Statistical indices of the simulated streamflow at the three hydrological stations by using product-specific calibration method for HAR and APHRODITE in the UB.

| Hydrological station | Precipitation inputs | Daily simulation period (2001–2013) |            |            | Monthly simulation period (2001–2013) |            |            |
|----------------------|----------------------|-------------------------------------|------------|------------|---------------------------------------|------------|------------|
|                      |                      | PBIAS (%)                           | NSE        | KGE        | PBIAS (%)                             | NSE        | KGE        |
| Nuxia                | HAR                  | -7.58(3.23)                         | 0.58(0.60) | 0.63(0.78) | -7.52(2.99)                           | 0.63(0.70) | 0.67(0.82) |
|                      | APHRODITE            | -36.64(-54.86)                      | 0.52(0.13) | 0.59(0.38) | -37.00(-54.97)                        | 0.56(0.15) | 0.61(0.40) |
| Yangcun              | HAR                  | -                                   | -          | -          | 17.64(42.52)                          | 0.56(0.22) | 0.55(0.53) |
|                      | APHRODITE            | -                                   | -          | -          | -26.41(-41.75)                        | 0.53(0.25) | 0.65(0.42) |
| Lhasa                | HAR                  | 16.33(26.71)                        | 0.48(0.29) | 0.48(0.56) | 16.40(26.92)                          | 0.54(0.48) | 0.49(0.57) |
|                      | APHRODITE            | -45.15(-60.64)                      | 0.41(0.21) | 0.46(0.34) | -45.20(-60.43)                        | 0.45(0.17) | 0.52(0.35) |

Note: The numbers in the parentheses are the statistical results of the simulation based on calibrated parameters using PCP\_Sun.
